# Supplementary material for: MiR-150-5p-modified Bone Marrow Mesenchymal Stem Cells Derived Exosomes Ameliorate Osteonecrosis of Femoral Head by Promoting Endothelial Cell Angiogenesis
Source: Research Square preprint supplement (doi:10.21203/rs.3.rs-84443/v1), 2020-10-07
Supplement: Supplementary file 1 [file be6aa3145985fb1210f81aae.docx]

**Additional file 6: Table S5.** Molecular function analysis of DEmiRNAs.

| GO ID | GO term | Gene number | -log10 (P-Value) |
| --- | --- | --- | --- |
| GO:0003690 | double-stranded DNA binding | 20 | 5.666277484 |
| GO:0005515 | protein binding | 518 | 4.842520547 |
| GO:0016301 | kinase activity | 69 | 4.55949549 |
| GO:0000166 | nucleotide binding | 147 | 3.935512817 |
| GO:0003682 | chromatin binding | 44 | 3.883708455 |
| GO:0003700 | sequence-specific DNA binding transcription factor activity | 84 | 3.862184481 |
| GO:0004672 | protein kinase activity | 49 | 3.808904253 |
